# Supplementary material for: A 30-year study of 355 cases with adult-type ovarian granulosa cell tumors in a tertiary center: Clinical features and factors predicting recurrence
Source: Research Square preprint supplement (doi:10.21203/rs.3.rs-7329250/v1), 2025-09-11
Supplement: Supplementary file 1 [file b7c08740debd59b2dd083b6c.xlsx]

## Sheet: Sheet1
Deceased (Yes/No)	Date of Death	Last Follow-up Date (All Outpatient + Inpatient)	Contact Phone Number	Medical Record Number	Patient Name	Age (at diagnosis or time of interview)	Gravidity (Number of pregnancies)	Parity (Number of deliveries)	Clinical Symptoms	Past Medical History	History of TH/THBS/THLSO Surgery (Yes/No)	Initial treatment or Recurrence	Preoperative BUS (including Endometrial Thickness, Adnexal Mass Size (cm))	Preoperative MRI	Preoperative CT	Preoperative PET-CT	Preoperative Last CA125	Preoperative Last AMH	Neoadjuvant Chemotherapy Received (Yes/No)	Neoadjuvant Chemotherapy Regimen and Number of Cycles	Primary Surgery Date	Primary Surgical Approach	Surgical Procedure	Fertility-Sparing Surgery Performed (Yes/No)	Dilation and Curettage (D&C) or Other Uterine Cavity Procedure Performed (Yes/No)	Lymph Node Dissection/Biopsy Performed During Primary Surgery (Yes/No)	Omentectomy/Omental Biopsy Performed During Primary Surgery (Yes/No)	Primary Surgery: Maximum Tumor Diameter (cm) - Macroscopic	Residual Tumor Size After Primary Treatment (Maximum Diameter of Residual Lesion)	Site(s) of Residual Disease	Gross Specimen Maximum Dimension (cm)	Pathology Result	Histological Subtype	Differentiation	If Mixed or Other Special Pathology Type, Please Specify	Endometrial Pathology	Lymph Node Pathology	Omental Metastasis	FIGO Stage	Post-operation adjuvant therapy received (Yes/No)	Adjuvant Therapy (Regimen + Number of Cycles / Duration / Number of Sessions)	Adjuvant Therapy Last Date	Recurrence or Progression After Primary Treatment	Recurrence or Progression Date	Type of First Recurrence (e.g., local, distant)	Recurrence Symptoms	Recurrence BUS	Recurrence MRI	Recurrence CT
[truncated: 18 more columns]
